# Supplementary material for: JUCHMME: a Java Utility for Class Hidden Markov Models and Extensions for biological sequence analysis
Source: Oxford University Press journal article supplement (doi:10.1093/bioinformatics/btz533), 2019-06-25
Supplement: bioinformatics_35_24_5309_s1.zip [file bioinformatics_35_24_5309_s1.zip]

# **JUCHMME: A Java Utility for Class Hidden Markov Models and Extensions for biological sequence analysis**

Ioannis A. Tamposis<sup>1</sup>, Konstantinos D. Tsirigos<sup>2</sup>, Margarita C. Theodoropoulou<sup>1</sup>, Panagiota I. Kontou<sup>1</sup>, Georgios N. Tsaousis<sup>3</sup>, Dimitra Sarantopoulou<sup>4</sup>, Zoi I. Litou<sup>5</sup>, Pantelis G. Bagos<sup>1,\*</sup>

<sup>1</sup>Department of Computer Science and Biomedical Informatics, University of Thessaly, 35100 Lamia, Greece,

<sup>2</sup>Department of Health Technology, Section for Bioinformatics, Technical University of Denmark, Kgs Lyngby, Denmark,

<sup>3</sup> Genekor Medical SA, Athens,

<sup>4</sup> Institute of Translational Medicine and Therapeutics, University of Pennsylvania, Philadelphia PA, USA

<sup>5</sup>Section of Cell Biology and Biophysics, Department of Biology, School of Science, National and Kapodistrian University of Athens, Athens, Greece

\*To whom correspondence should be addressed.

## **Supplementary Material**

## PART A – Usage scenario

A Hidden Markov Model is a probabilistic model defined by a discrete set of “hidden” states, a discrete set of observed symbols (e.g. amino acid residues in the case of proteins), and two set of distribution probabilities; the state transition probability distribution (transitions) and the observed symbol probability distribution (emissions). Let's assume we want to model a protein sequence analysis problem. To do this, we need to specify the state space, the initial probabilities, and the transition probabilities.

Let's consider a specific protein sequence analysis problem, such as the prediction of transmembrane regions of alpha-helical membrane proteins with the ability to incorporate prior topological information. We first need to design the model and consider the number of states and which the permissible transitions are. Figure 1 shows a schematic representation of the model used in HMM-TM, which is the example presented in this scenario.

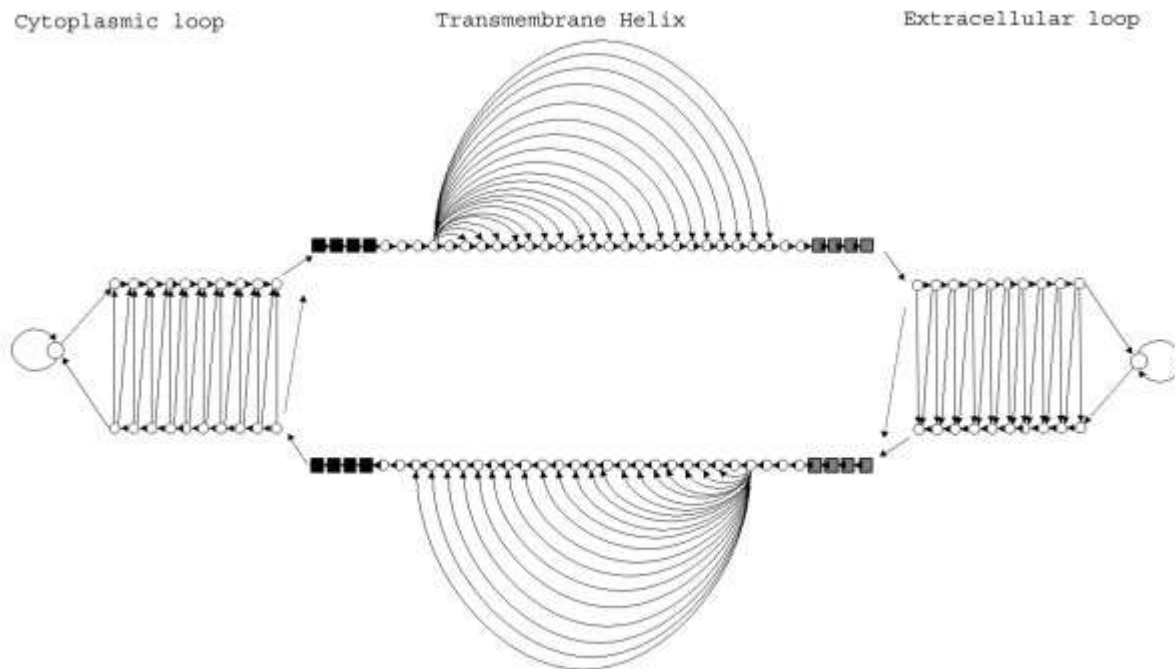

**Figure S1.** A schematic representation of the HMM-TM model's architecture

Knowing the number of states of the model, the first step is to define the transition probabilities. They are simply the probabilities of staying in the same state or moving to a different state given the current state. Here, the user could use a spreadsheet to create an  $N \times N$  table where  $N$  is the number of states of the model. Each transition probability depends on the biological problem. The transition matrix is perhaps the most important step because non-zero elements define the allowed transitions and thus the model architecture. In the example of alpha-helical transmembrane segments predictions, there are transmembrane states ( $M$  and  $m$ ), extracellular states ( $O$  and  $o$ ), intracellular states ( $I$  and  $i$ ) and the Begin ( $B$ ) and End ( $E$ ) states. All non-zero probabilities one can see in Figure 1, show permissible transitions between different states. Each line must sum to 1. For each line, the user can define a function to check the sum. Note that each state can have a name with more than one character; in the particular case for convenience we chose state names that remind us the type of the state, for instance  $M01$ ,  $M02$  for the membrane states, and so on.

|    | A   | B | C       | D | E | F | G | H | I | J | K | L | M | N | O | P | Q | R | S | T | U | V | W | X | Y | Z | AA | AB | AC |
|----|-----|---|---------|---|---|---|---|---|---|---|---|---|---|---|---|---|---|---|---|---|---|---|---|---|---|---|----|----|----|
| 1  |     |   |         |   |   |   |   |   |   |   |   |   |   |   |   |   |   |   |   |   |   |   |   |   |   |   |    |    |    |
| 2  | m00 | 0 | 0.02272 | 0 | 0 | 0 | 0 | 0 | 0 | 0 | 0 | 0 | 0 | 0 | 0 | 0 | 0 | 0 | 0 | 0 | 0 | 0 | 0 | 0 | 0 | 0 | 0  | 0  | 0  |
| 3  | m01 | 0 | 0       | 1 | 0 | 0 | 0 | 0 | 0 | 0 | 0 | 0 | 0 | 0 | 0 | 0 | 0 | 0 | 0 | 0 | 0 | 0 | 0 | 0 | 0 | 0 | 0  | 0  | 0  |
| 4  | m02 | 0 | 0       | 0 | 1 | 0 | 0 | 0 | 0 | 0 | 0 | 0 | 0 | 0 | 0 | 0 | 0 | 0 | 0 | 0 | 0 | 0 | 0 | 0 | 0 | 0 | 0  | 0  | 0  |
| 5  | m03 | 0 | 0       | 0 | 0 | 1 | 0 | 0 | 0 | 0 | 0 | 0 | 0 | 0 | 0 | 0 | 0 | 0 | 0 | 0 | 0 | 0 | 0 | 0 | 0 | 0 | 0  | 0  | 0  |
| 6  | m04 | 0 | 0       | 0 | 0 | 0 | 1 | 0 | 0 | 0 | 0 | 0 | 0 | 0 | 0 | 0 | 0 | 0 | 0 | 0 | 0 | 0 | 0 | 0 | 0 | 0 | 0  | 0  | 0  |
| 7  | m05 | 0 | 0       | 0 | 0 | 0 | 0 | 1 | 0 | 0 | 0 | 0 | 0 | 0 | 0 | 0 | 0 | 0 | 0 | 0 | 0 | 0 | 0 | 0 | 0 | 0 | 0  | 0  | 0  |
| 8  | m06 | 0 | 0       | 0 | 0 | 0 | 0 | 0 | 1 | 0 | 0 | 0 | 0 | 0 | 0 | 0 | 0 | 0 | 0 | 0 | 0 | 0 | 0 | 0 | 0 | 0 | 0  | 0  | 0  |
| 9  | m07 | 0 | 0       | 0 | 0 | 0 | 0 | 0 | 0 | 1 | 0 | 0 | 0 | 0 | 0 | 0 | 0 | 0 | 0 | 0 | 0 | 0 | 0 | 0 | 0 | 0 | 0  | 0  | 0  |
| 10 | m08 | 0 | 0       | 0 | 0 | 0 | 0 | 0 | 0 | 0 | 1 | 0 | 0 | 0 | 0 | 0 | 0 | 0 | 0 | 0 | 0 | 0 | 0 | 0 | 0 | 0 | 0  | 0  | 0  |
| 11 | m09 | 0 | 0       | 0 | 0 | 0 | 0 | 0 | 0 | 0 | 0 | 1 | 0 | 0 | 0 | 0 | 0 | 0 | 0 | 0 | 0 | 0 | 0 | 0 | 0 | 0 | 0  | 0  | 0  |
| 12 | m10 | 0 | 0       | 0 | 0 | 0 | 0 | 0 | 0 | 0 | 0 | 0 | 1 | 0 | 0 | 0 | 0 | 0 | 0 | 0 | 0 | 0 | 0 | 0 | 0 | 0 | 0  | 0  | 0  |
| 13 | m11 | 0 | 0       | 0 | 0 | 0 | 0 | 0 | 0 | 0 | 0 | 0 | 0 | 1 | 0 | 0 | 0 | 0 | 0 | 0 | 0 | 0 | 0 | 0 | 0 | 0 | 0  | 0  | 0  |
| 14 | m12 | 0 | 0       | 0 | 0 | 0 | 0 | 0 | 0 | 0 | 0 | 0 | 0 | 0 | 1 | 0 | 0 | 0 | 0 | 0 | 0 | 0 | 0 | 0 | 0 | 0 | 0  | 0  | 0  |
| 15 | m13 | 0 | 0       | 0 | 0 | 0 | 0 | 0 | 0 | 0 | 0 | 0 | 0 | 0 | 0 | 1 | 0 | 0 | 0 | 0 | 0 | 0 | 0 | 0 | 0 | 0 | 0  | 0  | 0  |
| 16 | m14 | 0 | 0       | 0 | 0 | 0 | 0 | 0 | 0 | 0 | 0 | 0 | 0 | 0 | 0 | 0 | 1 | 0 | 0 | 0 | 0 | 0 | 0 | 0 | 0 | 0 | 0  | 0  | 0  |
| 17 | m15 | 0 | 0       | 0 | 0 | 0 | 0 | 0 | 0 | 0 | 0 | 0 | 0 | 0 | 0 | 0 | 0 | 1 | 0 | 0 | 0 | 0 | 0 | 0 | 0 | 0 | 0  | 0  | 0  |
| 18 | m16 | 0 | 0       | 0 | 0 | 0 | 0 | 0 | 0 | 0 | 0 | 0 | 0 | 0 | 0 | 0 | 0 | 0 | 1 | 0 | 0 | 0 | 0 | 0 | 0 | 0 | 0  | 0  | 0  |
| 19 | m17 | 0 | 0       | 0 | 0 | 0 | 0 | 0 | 0 | 0 | 0 | 0 | 0 | 0 | 0 | 0 | 0 | 0 | 0 | 1 | 0 | 0 | 0 | 0 | 0 | 0 | 0  | 0  | 0  |
| 20 | m18 | 0 | 0       | 0 | 0 | 0 | 0 | 0 | 0 | 0 | 0 | 0 | 0 | 0 | 0 | 0 | 0 | 0 | 0 | 0 | 1 | 0 | 0 | 0 | 0 | 0 | 0  | 0  | 0  |
| 21 | m19 | 0 | 0       | 0 | 0 | 0 | 0 | 0 | 0 | 0 | 0 | 0 | 0 | 0 | 0 | 0 | 0 | 0 | 0 | 0 | 0 | 1 | 0 | 0 | 0 | 0 | 0  | 0  | 0  |
| 22 | m20 | 0 | 0       | 0 | 0 | 0 | 0 | 0 | 0 | 0 | 0 | 0 | 0 | 0 | 0 | 0 | 0 | 0 | 0 | 0 | 0 | 0 | 0 | 1 | 0 | 0 | 0  | 0  | 0  |
| 23 | m21 | 0 | 0       | 0 | 0 | 0 | 0 | 0 | 0 | 0 | 0 | 0 | 0 | 0 | 0 | 0 | 0 | 0 | 0 | 0 | 0 | 0 | 0 | 0 | 1 | 0 | 0  | 0  | 0  |
| 24 | m22 | 0 | 0       | 0 | 0 | 0 | 0 | 0 | 0 | 0 | 0 | 0 | 0 | 0 | 0 | 0 | 0 | 0 | 0 | 0 | 0 | 0 | 0 | 0 | 0 | 1 | 0  | 0  | 0  |
| 25 | m23 | 0 | 0       | 0 | 0 | 0 | 0 | 0 | 0 | 0 | 0 | 0 | 0 | 0 | 0 | 0 | 0 | 0 | 0 | 0 | 0 | 0 | 0 | 0 | 0 | 0 | 1  | 0  | 0  |
| 26 | m24 | 0 | 0       | 0 | 0 | 0 | 0 | 0 | 0 | 0 | 0 | 0 | 0 | 0 | 0 | 0 | 0 | 0 | 0 | 0 | 0 | 0 | 0 | 0 | 0 | 0 | 0  | 1  | 0  |
| 27 | m25 | 0 | 0       | 0 | 0 | 0 | 0 | 0 | 0 | 0 | 0 | 0 | 0 | 0 | 0 | 0 | 0 | 0 | 0 | 0 | 0 | 0 | 0 | 0 | 0 | 0 | 0  | 0  | 1  |
| 28 | m26 | 0 | 0       | 0 | 0 | 0 | 0 | 0 | 0 | 0 | 0 | 0 | 0 | 0 | 0 | 0 | 0 | 0 | 0 | 0 | 0 | 0 | 0 | 0 | 0 | 0 | 0  | 0  | 0  |
| 29 | m27 | 0 | 0       | 0 | 0 | 0 | 0 | 0 | 0 | 0 | 0 | 0 | 0 | 0 | 0 | 0 | 0 | 0 | 0 | 0 | 0 | 0 | 0 | 0 | 0 | 0 | 0  | 0  | 0  |
| 30 | m28 | 0 | 0       | 0 | 0 | 0 | 0 | 0 | 0 | 0 | 0 | 0 | 0 | 0 | 0 | 0 | 0 | 0 | 0 | 0 | 0 | 0 | 0 | 0 | 0 | 0 | 0  | 0  | 0  |
| 31 | m29 | 0 | 0       | 0 | 0 | 0 | 0 | 0 | 0 | 0 | 0 | 0 | 0 | 0 | 0 | 0 | 0 | 0 | 0 | 0 | 0 | 0 | 0 | 0 | 0 | 0 | 0  | 0  | 0  |
| 32 | m30 | 0 | 0       | 0 | 0 | 0 | 0 | 0 | 0 | 0 | 0 | 0 | 0 | 0 | 0 | 0 | 0 | 0 | 0 | 0 | 0 | 0 | 0 | 0 | 0 | 0 | 0  | 0  | 0  |
| 33 | m31 | 0 | 0       | 0 | 0 | 0 | 0 | 0 | 0 | 0 | 0 | 0 | 0 | 0 | 0 | 0 | 0 | 0 | 0 | 0 | 0 | 0 | 0 | 0 | 0 | 0 | 0  | 0  | 0  |
| 34 | m32 | 0 | 0       | 0 | 0 | 0 | 0 | 0 | 0 | 0 | 0 | 0 | 0 | 0 | 0 | 0 | 0 | 0 | 0 | 0 | 0 | 0 | 0 | 0 | 0 | 0 | 0  | 0  | 0  |
| 35 | m33 | 0 | 0       | 0 | 0 | 0 | 0 | 0 | 0 | 0 | 0 | 0 | 0 | 0 | 0 | 0 | 0 | 0 | 0 | 0 | 0 | 0 | 0 | 0 | 0 | 0 | 0  | 0  | 0  |
| 36 | m34 | 0 | 0       | 0 | 0 | 0 | 0 | 0 | 0 | 0 | 0 | 0 | 0 | 0 | 0 | 0 | 0 | 0 | 0 | 0 | 0 | 0 | 0 | 0 | 0 | 0 | 0  | 0  | 0  |
| 37 | m35 | 0 | 0       | 0 | 0 | 0 | 0 | 0 | 0 | 0 | 0 | 0 | 0 | 0 | 0 | 0 | 0 | 0 | 0 | 0 | 0 | 0 | 0 | 0 | 0 | 0 | 0  | 0  | 0  |
| 38 | m36 | 0 | 0       | 0 | 0 | 0 | 0 | 0 | 0 | 0 | 0 | 0 | 0 | 0 | 0 | 0 | 0 | 0 | 0 | 0 | 0 | 0 | 0 | 0 | 0 | 0 | 0  | 0  | 0  |
| 39 | m37 | 0 | 0       | 0 | 0 | 0 | 0 | 0 | 0 | 0 | 0 | 0 | 0 | 0 | 0 | 0 | 0 | 0 | 0 | 0 | 0 | 0 | 0 | 0 | 0 | 0 | 0  | 0  | 0  |
| 40 | m38 | 0 | 0       | 0 | 0 | 0 | 0 | 0 | 0 | 0 | 0 | 0 | 0 | 0 | 0 | 0 | 0 | 0 | 0 | 0 | 0 | 0 | 0 | 0 | 0 | 0 | 0  | 0  | 0  |
| 41 | m39 | 0 | 0       | 0 | 0 | 0 | 0 | 0 | 0 | 0 | 0 | 0 | 0 | 0 | 0 | 0 | 0 | 0 | 0 | 0 | 0 | 0 | 0 | 0 | 0 | 0 | 0  | 0  | 0  |
| 42 | m40 | 0 | 0       | 0 | 0 | 0 | 0 | 0 | 0 | 0 | 0 | 0 | 0 | 0 | 0 | 0 | 0 | 0 | 0 | 0 | 0 | 0 | 0 | 0 | 0 | 0 | 0  | 0  | 0  |
| 43 | m41 | 0 | 0       | 0 | 0 | 0 | 0 | 0 | 0 | 0 | 0 | 0 | 0 | 0 | 0 | 0 | 0 | 0 | 0 | 0 | 0 | 0 | 0 | 0 | 0 | 0 | 0  | 0  | 0  |
| 44 | m42 | 0 | 0       | 0 | 0 | 0 | 0 | 0 | 0 | 0 | 0 | 0 | 0 | 0 | 0 | 0 | 0 | 0 | 0 | 0 | 0 | 0 | 0 | 0 | 0 | 0 | 0  | 0  | 0  |
| 45 | m43 | 0 | 0       | 0 | 0 | 0 | 0 | 0 | 0 | 0 | 0 | 0 | 0 | 0 | 0 | 0 | 0 | 0 | 0 | 0 | 0 | 0 | 0 | 0 | 0 | 0 | 0  | 0  | 0  |
| 46 | m44 | 0 | 0       | 0 | 0 | 0 | 0 | 0 | 0 | 0 | 0 | 0 | 0 | 0 | 0 | 0 | 0 | 0 | 0 | 0 | 0 | 0 | 0 | 0 | 0 | 0 | 0  | 0  | 0  |
| 47 | m45 | 0 | 0       | 0 | 0 | 0 | 0 | 0 | 0 | 0 | 0 | 0 | 0 | 0 | 0 | 0 | 0 | 0 | 0 | 0 | 0 | 0 | 0 | 0 | 0 | 0 | 0  | 0  | 0  |
| 48 | m46 | 0 | 0       | 0 | 0 | 0 | 0 | 0 | 0 | 0 | 0 | 0 | 0 | 0 | 0 | 0 | 0 | 0 | 0 | 0 | 0 | 0 | 0 | 0 | 0 | 0 | 0  | 0  | 0  |
| 49 | m47 | 0 | 0       | 0 | 0 | 0 | 0 | 0 | 0 | 0 | 0 | 0 | 0 | 0 | 0 | 0 | 0 | 0 | 0 | 0 | 0 | 0 | 0 | 0 | 0 | 0 | 0  | 0  | 0  |
| 50 | m48 | 0 | 0       | 0 | 0 | 0 | 0 | 0 | 0 | 0 | 0 | 0 | 0 | 0 | 0 | 0 | 0 | 0 | 0 | 0 | 0 | 0 | 0 | 0 | 0 | 0 | 0  | 0  | 0  |
| 51 | m49 | 0 | 0       | 0 | 0 | 0 | 0 | 0 | 0 | 0 | 0 | 0 | 0 | 0 | 0 | 0 | 0 | 0 | 0 | 0 | 0 | 0 | 0 | 0 | 0 | 0 | 0  | 0  | 0  |
| 52 | m50 | 0 | 0       | 0 | 0 | 0 | 0 | 0 | 0 | 0 | 0 | 0 | 0 | 0 | 0 | 0 | 0 | 0 | 0 | 0 | 0 | 0 | 0 | 0 | 0 | 0 | 0  | 0  | 0  |
| 53 | m51 | 0 | 0       | 0 | 0 | 0 | 0 | 0 | 0 | 0 | 0 | 0 | 0 | 0 | 0 | 0 | 0 | 0 | 0 | 0 | 0 | 0 | 0 | 0 | 0 | 0 | 0  | 0  | 0  |
| 54 | m52 | 0 | 0       | 0 | 0 | 0 | 0 | 0 | 0 | 0 | 0 | 0 | 0 | 0 | 0 | 0 | 0 | 0 | 0 | 0 | 0 | 0 | 0 | 0 | 0 | 0 | 0  | 0  | 0  |

Figure S2. The transition probabilities table

In the end, the user will copy the column with probabilities and paste at the text editor and save it at the hard disk.

The next step is to define the emission probabilities. The emission probability represents how likely a symbol is to be emitted on each state. The size of this set depends on the nature of the observed variable. In the case of proteins, an observed sequence is composed of a discrete set of 20 symbols, following the alphabetical order of single-letter codes for the 20 amino acids: A, C, D, E, F, G, H, I, K, L, M, N, P, Q, R, S, T, V, W, Y. In the example of alpha-helical transmembrane topology prediction, a Nx20 table represents the emission probabilities

| Model Parameters (Emissions-Transitions).xlsx - Excel |     |       |       |       |       |       |       |       |       |       |       |       |       |       |       |       |       |       |       |       |       |   |   |   |   |
|-------------------------------------------------------|-----|-------|-------|-------|-------|-------|-------|-------|-------|-------|-------|-------|-------|-------|-------|-------|-------|-------|-------|-------|-------|---|---|---|---|
|                                                       | A   | B     | C     | D     | E     | F     | G     | H     | I     | J     | K     | L     | M     | N     | O     | P     | Q     | R     | S     | T     | U     | V | W | X | Y |
| 1                                                     |     |       |       |       |       |       |       |       |       |       |       |       |       |       |       |       |       |       |       |       |       |   |   |   |   |
| 2                                                     | B00 | 0     | 0     | 0     | 0     | 0     | 0     | 0     | 0     | 0     | 0     | 0     | 0     | 0     | 0     | 0     | 0     | 0     | 0     | 0     | 0     | 0 | 0 | 0 | 0 |
| 3                                                     | M01 | 0.103 | 0.006 | 0.024 | 0.035 | 0.062 | 0.066 | 0.029 | 0.066 | 0.034 | 0.147 | 0.038 | 0.021 | 0.041 | 0.027 | 0.044 | 0.051 | 0.05  | 0.075 | 0.039 | 0.042 |   |   |   |   |
| 4                                                     | M02 | 0.103 | 0.006 | 0.024 | 0.035 | 0.062 | 0.066 | 0.029 | 0.066 | 0.034 | 0.147 | 0.038 | 0.021 | 0.041 | 0.027 | 0.044 | 0.051 | 0.05  | 0.075 | 0.039 | 0.042 |   |   |   |   |
| 5                                                     | M03 | 0.103 | 0.006 | 0.024 | 0.035 | 0.062 | 0.066 | 0.029 | 0.066 | 0.034 | 0.147 | 0.038 | 0.021 | 0.041 | 0.027 | 0.044 | 0.051 | 0.05  | 0.075 | 0.039 | 0.042 |   |   |   |   |
| 6                                                     | M04 | 0.103 | 0.006 | 0.024 | 0.035 | 0.062 | 0.066 | 0.029 | 0.066 | 0.034 | 0.147 | 0.038 | 0.021 | 0.041 | 0.027 | 0.044 | 0.051 | 0.05  | 0.075 | 0.039 | 0.042 |   |   |   |   |
| 7                                                     | M05 | 0.103 | 0.006 | 0.024 | 0.035 | 0.062 | 0.066 | 0.029 | 0.066 | 0.034 | 0.147 | 0.038 | 0.021 | 0.041 | 0.027 | 0.044 | 0.051 | 0.05  | 0.075 | 0.039 | 0.042 |   |   |   |   |
| 8                                                     | m01 | 0.119 | 0.012 | 0.01  | 0.01  | 0.088 | 0.09  | 0.029 | 0.097 | 0.011 | 0.16  | 0.042 | 0.015 | 0.021 | 0.012 | 0.015 | 0.05  | 0.056 | 0.105 | 0.032 | 0.029 |   |   |   |   |
| 9                                                     | m02 | 0.119 | 0.012 | 0.01  | 0.01  | 0.088 | 0.09  | 0.029 | 0.097 | 0.011 | 0.16  | 0.042 | 0.015 | 0.021 | 0.012 | 0.015 | 0.05  | 0.056 | 0.105 | 0.032 | 0.029 |   |   |   |   |
| 10                                                    | m03 | 0.119 | 0.012 | 0.01  | 0.01  | 0.088 | 0.09  | 0.029 | 0.097 | 0.011 | 0.16  | 0.042 | 0.015 | 0.021 | 0.012 | 0.015 | 0.05  | 0.056 | 0.105 | 0.032 | 0.029 |   |   |   |   |
| 11                                                    | m04 | 0.119 | 0.012 | 0.01  | 0.01  | 0.088 | 0.09  | 0.029 | 0.097 | 0.011 | 0.16  | 0.042 | 0.015 | 0.021 | 0.012 | 0.015 | 0.05  | 0.056 | 0.105 | 0.032 | 0.029 |   |   |   |   |
| 12                                                    | m05 | 0.119 | 0.012 | 0.01  | 0.01  | 0.088 | 0.09  | 0.029 | 0.097 | 0.011 | 0.16  | 0.042 | 0.015 | 0.021 | 0.012 | 0.015 | 0.05  | 0.056 | 0.105 | 0.032 | 0.029 |   |   |   |   |
| 13                                                    | m06 | 0.119 | 0.012 | 0.01  | 0.01  | 0.088 | 0.09  | 0.029 | 0.097 | 0.011 | 0.16  | 0.042 | 0.015 | 0.021 | 0.012 | 0.015 | 0.05  | 0.056 | 0.105 | 0.032 | 0.029 |   |   |   |   |
| 14                                                    | m07 | 0.119 | 0.012 | 0.01  | 0.01  | 0.088 | 0.09  | 0.029 | 0.097 | 0.011 | 0.16  | 0.042 | 0.015 | 0.021 | 0.012 | 0.015 | 0.05  | 0.056 | 0.105 | 0.032 | 0.029 |   |   |   |   |
| 15                                                    | m08 | 0.119 | 0.012 | 0.01  | 0.01  | 0.088 | 0.09  | 0.029 | 0.097 | 0.011 | 0.16  | 0.042 | 0.015 | 0.021 | 0.012 | 0.015 | 0.05  | 0.056 | 0.105 | 0.032 | 0.029 |   |   |   |   |
| 16                                                    | m09 | 0.119 | 0.012 | 0.01  | 0.01  | 0.088 | 0.09  | 0.029 | 0.097 | 0.011 | 0.16  | 0.042 | 0.015 | 0.021 | 0.012 | 0.015 | 0.05  | 0.056 | 0.105 | 0.032 | 0.029 |   |   |   |   |
| 17                                                    | m10 | 0.119 | 0.012 | 0.01  | 0.01  | 0.088 | 0.09  | 0.029 | 0.097 | 0.011 | 0.16  | 0.042 | 0.015 | 0.021 | 0.012 | 0.015 | 0.05  | 0.056 | 0.105 | 0.032 | 0.029 |   |   |   |   |
| 18                                                    | m11 | 0.119 | 0.012 | 0.01  | 0.01  | 0.088 | 0.09  | 0.029 | 0.097 | 0.011 | 0.16  | 0.042 | 0.015 | 0.021 | 0.012 | 0.015 | 0.05  | 0.056 | 0.105 | 0.032 | 0.029 |   |   |   |   |
| 19                                                    | m12 | 0.119 | 0.012 | 0.01  | 0.01  | 0.088 | 0.09  | 0.029 | 0.097 | 0.011 | 0.16  | 0.042 | 0.015 | 0.021 | 0.012 | 0.015 | 0.05  | 0.056 | 0.105 | 0.032 | 0.029 |   |   |   |   |
| 20                                                    | m13 | 0.119 | 0.012 | 0.01  | 0.01  | 0.088 | 0.09  | 0.029 | 0.097 | 0.011 | 0.16  | 0.042 | 0.015 | 0.021 | 0.012 | 0.015 | 0.05  | 0.056 | 0.105 | 0.032 | 0.029 |   |   |   |   |
| 21                                                    | m14 | 0.119 | 0.012 | 0.01  | 0.01  | 0.088 | 0.09  | 0.029 | 0.097 | 0.011 | 0.16  | 0.042 | 0.015 | 0.021 | 0.012 | 0.015 | 0.05  | 0.056 | 0.105 | 0.032 | 0.029 |   |   |   |   |
| 22                                                    | m15 | 0.119 | 0.012 | 0.01  | 0.01  | 0.088 | 0.09  | 0.029 | 0.097 | 0.011 | 0.16  | 0.042 | 0.015 | 0.021 | 0.012 | 0.015 | 0.05  | 0.056 | 0.105 | 0.032 | 0.029 |   |   |   |   |
| 23                                                    | m16 | 0.119 | 0.012 | 0.01  | 0.01  | 0.088 | 0.09  | 0.029 | 0.097 | 0.011 | 0.16  | 0.042 | 0.015 | 0.021 | 0.012 | 0.015 | 0.05  | 0.056 | 0.105 | 0.032 | 0.029 |   |   |   |   |
| 24                                                    | m17 | 0.119 | 0.012 | 0.01  | 0.01  | 0.088 | 0.09  | 0.029 | 0.097 | 0.011 | 0.16  | 0.042 | 0.015 | 0.021 | 0.012 | 0.015 | 0.05  | 0.056 | 0.105 | 0.032 | 0.029 |   |   |   |   |
| 25                                                    | m18 | 0.119 | 0.012 | 0.01  | 0.01  | 0.088 | 0.09  | 0.029 | 0.097 | 0.011 | 0.16  | 0.042 | 0.015 | 0.021 | 0.012 | 0.015 | 0.05  | 0.056 | 0.105 | 0.032 | 0.029 |   |   |   |   |
| 26                                                    | m19 | 0.119 | 0.012 | 0.01  | 0.01  | 0.088 | 0.09  | 0.029 | 0.097 | 0.011 | 0.16  | 0.042 | 0.015 | 0.021 | 0.012 | 0.015 | 0.05  | 0.056 | 0.105 | 0.032 | 0.029 |   |   |   |   |
| 27                                                    | m20 | 0.119 | 0.012 | 0.01  | 0.01  | 0.088 | 0.09  | 0.029 | 0.097 | 0.011 | 0.16  | 0.042 | 0.015 | 0.021 | 0.012 | 0.015 | 0.05  | 0.056 | 0.105 | 0.032 | 0.029 |   |   |   |   |
| 28                                                    | m21 | 0.119 | 0.012 | 0.01  | 0.01  | 0.088 | 0.09  | 0.029 | 0.097 | 0.011 | 0.16  | 0.042 | 0.015 | 0.021 | 0.012 | 0.015 | 0.05  | 0.056 | 0.105 | 0.032 | 0.029 |   |   |   |   |
| 29                                                    | m22 | 0.119 | 0.012 | 0.01  | 0.01  | 0.088 | 0.09  | 0.029 | 0.097 | 0.011 | 0.16  | 0.042 | 0.015 | 0.021 | 0.012 | 0.015 | 0.05  | 0.056 | 0.105 | 0.032 | 0.029 |   |   |   |   |
| 30                                                    | m23 | 0.119 | 0.012 | 0.01  | 0.01  | 0.088 | 0.09  | 0.029 | 0.097 | 0.011 | 0.16  | 0.042 | 0.015 | 0.021 | 0.012 | 0.015 | 0.05  | 0.056 | 0.105 | 0.032 | 0.029 |   |   |   |   |
| 31                                                    | m24 | 0.119 | 0.012 | 0.01  | 0.01  | 0.088 | 0.09  | 0.029 | 0.097 | 0.011 | 0.16  | 0.042 | 0.015 | 0.021 | 0.012 | 0.015 | 0.05  | 0.056 | 0.105 | 0.032 | 0.029 |   |   |   |   |
| 32                                                    | m25 | 0.119 | 0.012 | 0.01  | 0.01  | 0.088 | 0.09  | 0.029 | 0.097 | 0.011 | 0.16  | 0.042 | 0.015 | 0.021 | 0.012 | 0.015 | 0.05  | 0.056 | 0.105 | 0.032 | 0.029 |   |   |   |   |
| 33                                                    | M06 | 0.103 | 0.006 | 0.024 | 0.035 | 0.062 | 0.066 | 0.029 | 0.066 | 0.034 | 0.147 | 0.038 | 0.021 | 0.041 | 0.027 | 0.044 | 0.051 | 0.05  | 0.075 | 0.039 | 0.042 |   |   |   |   |
| 34                                                    | M07 | 0.103 | 0.006 | 0.024 | 0.035 | 0.062 | 0.066 | 0.029 | 0.066 | 0.034 | 0.147 | 0.038 | 0.021 | 0.041 | 0.027 | 0.044 | 0.051 | 0.05  | 0.075 | 0.039 | 0.042 |   |   |   |   |
| 35                                                    | M08 | 0.103 | 0.006 | 0.024 | 0.035 | 0.062 | 0.066 | 0.029 | 0.066 | 0.034 | 0.147 | 0.038 | 0.021 | 0.041 | 0.027 | 0.044 | 0.051 | 0.05  | 0.075 | 0.039 | 0.042 |   |   |   |   |
| 36                                                    | M09 | 0.103 | 0.006 | 0.024 | 0.035 | 0.062 | 0.066 | 0.029 | 0.066 | 0.034 | 0.147 | 0.038 | 0.021 | 0.041 | 0.027 | 0.044 | 0.051 | 0.05  | 0.075 | 0.039 | 0.042 |   |   |   |   |
| 37                                                    | M10 | 0.103 | 0.006 | 0.024 | 0.035 | 0.062 | 0.066 | 0.029 | 0.066 | 0.034 | 0.147 | 0.038 | 0.021 | 0.041 | 0.027 | 0.044 | 0.051 | 0.05  | 0.075 | 0.039 | 0.042 |   |   |   |   |
| 38                                                    | O01 | 0.083 | 0.006 | 0.053 | 0.046 | 0.054 | 0.111 | 0.025 | 0.049 | 0.022 | 0.082 | 0.027 | 0.041 | 0.082 | 0.039 | 0.03  | 0.058 | 0.054 | 0.06  | 0.034 | 0.044 |   |   |   |   |
| 39                                                    | O02 | 0.083 | 0.006 | 0.053 | 0.046 | 0.054 | 0.111 | 0.025 | 0.049 | 0.022 | 0.082 | 0.027 | 0.041 | 0.082 | 0.039 | 0.03  | 0.058 | 0.054 | 0.06  | 0.034 | 0.044 |   |   |   |   |

Figure S3. The emission probabilities table

In the end, the user copies the column with probabilities, pastes them at Notepad or any other plain text editor and saves them on the file system.

Now that we have the initial transition and emission probabilities set up, we can create a Markov diagram using an appropriate software package.

The next step is to set up the model file using a plain text editor. The user creates the file according to the final state names, observed symbols and label names. Specifically, the user can name the model, define the symbol alphabet (Figure S3, see ESYM), the label alphabet (Figure S3, see PSYM), as well as, the specific states of the model (Figure S3, see STATE) and their corresponding labels (Figure S3, see PSYM). OSYM is a special “intermediate” condition between states and labels that defines the tied states, which are the states that share the same emission probabilities (in order to reduce the model parameters). Note that in the current configuration a state can correspond only to one label, but states with different labels can be tied together. The user may also define prior probabilities for each symbol or label if he/she wishes to (Figure S3, see PRIOR). The model configuration file is quite self-explanatory as one can see in Figure 3.



```
maxIter=200
```

### HNN Configuration Settings

```
# TRAINING OPTIONS
RUN_CML= true (!important to enable Conditional Maximum Likelihood Learning)
RUN_GRADIENT=true
HNN= true (!important to enable HNN extension)

#HNN OPTIONS
windowLeft=3
windowRigth=3
nhidden=3
ADD_GRAD=0.0
DECAY=0.001
#1: Sigmoid, 2: Sigmoid Modified, 3: Tanh
hiddenLayerFunction=2
```

The user may test different configurations before concluding to the most efficient one.

### *Decoding*

Using the available algorithms, we can identify the most likely sequence of hidden states or the most probable labeling given the sequence of observations. Again, the user can choose which decoding algorithm will be used by editing the respective section of the configuration file as shown below.

### Configuration Settings

```
# DECODING OPTIONS
VITERBI=true
NBEST=false
DYNAMIC=false
POSVIT=false
PLP=true
```

Since JUCHMME was originally developed to train and test transmembrane prediction models, some commonly used measures of accuracy are calculated and offered to the users. Specifically, the number of correctly predicted residues (Q), the segment overlap (SOV) measure and the number of correctly predicted topologies are calculated by JUCHMME and may be used to evaluate the new models.

#### VITERBI:

|          |          |           |          |           |                |                |               |
|----------|----------|-----------|----------|-----------|----------------|----------------|---------------|
| Q2:0.845 | Qa:0.737 | Qna:0.916 | Pa:0.855 | Pna:0.839 | Qfas:0.827     |                |               |
| Ca:0.673 | SM:0.885 | TP:596    | FP:37    | FN:122    | Correct Top:10 | Correct Ori:10 | Avg SOV:0.787 |

#### PLP:

|          |          |           |          |           |                |                |               |
|----------|----------|-----------|----------|-----------|----------------|----------------|---------------|
| Q2:0.852 | Qa:0.772 | Qna:0.906 | Pa:0.846 | Pna:0.856 | Qfas:0.839     |                |               |
| Ca:0.690 | SM:0.904 | TP:627    | FP:47    | FN:91     | Correct Top:14 | Correct Ori:14 | Avg SOV:0.807 |

To further highlight how simple it is to build a new model using JUCHMME, let's consider a follow-up scenario. In an attempt to further improve the reliability of alpha-helical transmembrane topology prediction, we chose to incorporate the post-translational modifications, phosphorylation and glycosylation, which are known to be compartment-specific and therefore the presence of a phosphorylation or glycosylation site in a transmembrane protein provides topological information. With



this in mind the model of HMM-TM was re-designed to include phosphorylation and glycosylation specific states as part of the intracellular and the extracellular sub-models respectively (Figure S5).

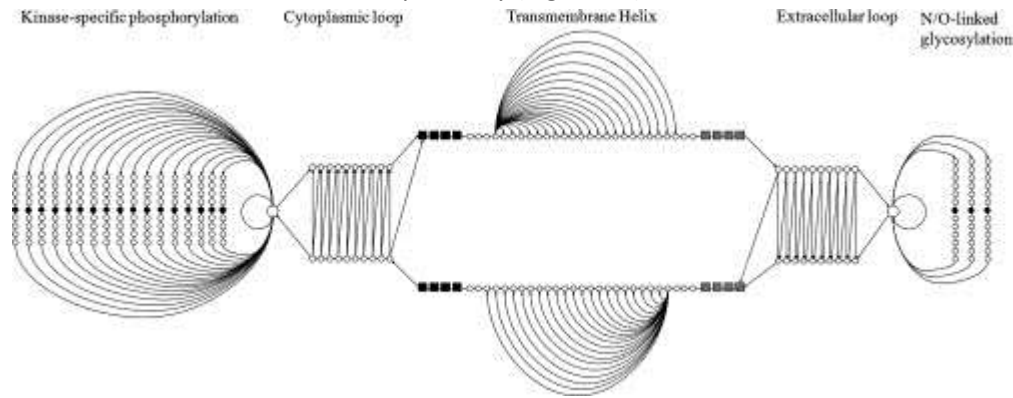

**Figure S5.** A schematic representation of the HMMpTM model's architecture

To build the new model, we modified the architecture of the existing HMM-TM model. As one can see in Figure S6, using JUCHMME it is easy to modify the architecture of existing models by editing the model configuration file. The OSYM, PSYM, STATE, OSTATE, PSTATE fields are changed accordingly. Also, both the transition and emission probabilities tables need to be modified using a spreadsheet based on the new model.

```

1 # MODEL OPTIONS
2 MODEL=056p/TH
3
4 EDON=ACDFGCEILMBFGQRTVWY
5 COMWILMBGCoOyDZE
6 EDON=IMDGygcwdefpqrBE
7
8 #Model Unique Labels
9 transLabels=M
10 inLabels=V
11 outLabels=C
12
13 #Model states and labels
14 STATE=M01 M02 M03 M04 M05 M06 M07 M08 M09 M10 M11 M12 M13 M14 M15 M16 M17 M18 M19 M20 M21 M22 M23 M24 M25 M26 M27 M28 M29 M30
15 01 02 03 04 05 06 07 08 09 10 11 12 13 14 15 16 17 18 19 20 21 22 23 24 25 26 27 28 29 30 31 32 33 34 35 36 37 38 39 40 41 42 43 44 45 46 47 48 49 50 51 52 53 54 55 56 57 58 59 60 61 62 63 64 65 66 67 68 69 70 71 72 73 74 75 76 77 78 79 80 81 82 83 84 85 86 87 88 89 90 91 92 93 94 95 96 97 98 99 100 101 102 103 104 105 106 107 108 109 110 111 112 113 114 115 116 117 118 119 120 121 122 123 124 125 126 127 128 129 130 131 132 133 134 135 136 137 138 139 140 141 142 143 144 145 146 147 148 149 150 151 152 153 154 155 156 157 158 159 160 161 162 163 164 165 166 167 168 169 170 171 172 173 174 175 176 177 178 179 180 181 182 183 184 185 186 187 188 189 190 191 192 193 194 195 196 197 198 199 200 201 202 203 204 205 206 207 208 209 210 211 212 213 214 215 216 217 218 219 220 221 222 223 224 225 226 227 228 229 230 231 232 233 234 235 236 237 238 239 240 241 242 243 244 245 246 247 248 249 250 251 252 253 254 255 256 257 258 259 260 261 262 263 264 265 266 267 268 269 270 271 272 273 274 275 276 277 278 279 280 281 282 283 284 285 286 287 288 289 290 291 292 293 294 295 296 297 298 299 300 301 302 303 304 305 306 307 308 309 310 311 312 313 314 315 316 317 318 319 320 321 322 323 324 325 326 327 328 329 330 331 332 333 334 335 336 337 338 339 340 341 342 343 344 345 346 347 348 349 350 351 352 353 354 355 356 357 358 359 360 361 362 363 364 365 366 367 368 369 370 371 372 373 374 375 376 377 378 379 380 381 382 383 384 385 386 387 388 389 390 391 392 393 394 395 396 397 398 399 400 401 402 403 404 405 406 407 408 409 410 411 412 413 414 415 416 417 418 419 420 421 422 423 424 425 426 427 428 429 430 431 432 433 434 435 436 437 438 439 440 441 442 443 444 445 446 447 448 449 450 451 452 453 454 455 456 457 458 459 460 461 462 463 464 465 466 467 468 469 470 471 472 473 474 475 476 477 478 479 480 481 482 483 484 485 486 487 488 489 490 491 492 493 494 495 496 497 498 499 500 501 502 503 504 505 506 507 508 509 510 511 512 513 514 515 516 517 518 519 520 521 522 523 524 525 526 527 528 529 530 531 532 533 534 535 536 537 538 539 540 541 542 543 544 545 546 547 548 549 550 551 552 553 554 555 556 557 558 559 560 561 562 563 564 565 566 567 568 569 570 571 572 573 574 575 576 577 578 579 580 581 582 583 584 585 586 587 588 589 590 591 592 593 594 595 596 597 598 599 600 601 602 603 604 605 606 607 608 609 610 611 612 613 614 615 616 617 618 619 620 621 622 623 624 625 626 627 628 629 630 631 632 633 634 635 636 637 638 639 640 641 642 643 644 645 646 647 648 649 650 651 652 653 654 655 656 657 658 659 660 661 662 663 664 665 666 667 668 669 670 671 672 673 674 675 676 677 678 679 680 681 682 683 684 685 686 687 688 689 690 691 692 693 694 695 696 697 698 699 700 701 702 703 704 705 706 707 708 709 710 711 712 713 714 715 716 717 718 719 720 721 722 723 724 725 726 727 728 729 730 731 732 733 734 735 736 737 738 739 740 741 742 743 744 745 746 747 748 749 750 751 752 753 754 755 756 757 758 759 760 761 762 763 764 765 766 767 768 769 770 771 772 773 774 775 776 777 778 779 780 781 782 783 784 785 786 787 788 789 790 791 792 793 794 795 796 797 798 799 800 801 802 803 804 805 806 807 808 809 810 811 812 813 814 815 816 817 818 819 820 821 822 823 824 825 826 827 828 829 830 831 832 833 834 835 836 837 838 839 840 841 842 843 844 845 846 847 848 849 850 851 852 853 854 855 856 857 858 859 860 861 862 863 864 865 866 867 868 869 870 871 872 873 874 875 876 877 878 879 880 881 882 883 884 885 886 887 888 889 890 891 892 893 894 895 896 897 898 899 900 901 902 903 904 905 906 907 908 909 910 911 912 913 914 915 916 917 918 919 920 921 922 923 924 925 926 927 928 929 930 931 932 933 934 935 936 937 938 939 940 941 942 943 944 945 946 947 948 949 950 951 952 953 954 955 956 957 958 959 960 961 962 963 964 965 966 967 968 969 970 971 972 973 974 975 976 977 978 979 980 981 982 983 984 985 986 987 988 989 990 991 992 993 994 995 996 997 998 999 10
```

**Figure S6.**The HMMpTM model configuration file

## PART B – Comparison of Speed

The following table and figures present the testing of traditional HMM Dishonest Casino model, CpG Island model [1], PRED-TMBB model [2] and PRED-TAT model [3]. The programs were compiled and run in Ubuntu Linux on an Intel Xeon E5-2660 10-core 2.00 GHz server with 32 GB RAM. Time was evaluated using the Unix time function and all values reported as the average of 5 runs. We used a varying number of input sequences (500, 1000, 3000, 5000 with 500 symbols per sequence) and we evaluated both Viterbi and Posterior decoding algorithms.

**Table S1.** Evaluation of JUCHMME and StochHMM in terms of speed using different models and varying number of input sequences

| Model                 | Algorithm | Number of Sequences | JUCHMME (serial mode) | JUCHMME (Parallel mode) | StochHMM |
|-----------------------|-----------|---------------------|-----------------------|-------------------------|----------|
| Casino<br>2 states    | Viterbi   | 500                 | 2.150                 | 1.941                   | 0.181    |
|                       |           | 1000                | 3.536                 | 3.373                   | 0.277    |
|                       |           | 3000                | 10.303                | 10.148                  | 3.918    |
|                       |           | 5000                | 15.864                | 15.749                  | 5.328    |
|                       | Posterior | 500                 | 2.499                 | 1.951                   | 0.255    |
|                       |           | 1000                | 4.417                 | 3.223                   | 0.493    |
|                       |           | 3000                | 11.799                | 10.073                  | 3.169    |
|                       |           | 5000                | 17.882                | 16.072                  | 5.527    |
| CpG<br>8 states       | Viterbi   | 500                 | 3.905                 | 2.073                   | 0.239    |
|                       |           | 1000                | 7.003                 | 3.526                   | 0.365    |
|                       |           | 3000                | 18.546                | 10.365                  | 3.798    |
|                       |           | 5000                | 29.584                | 16.891                  | 6.357    |
|                       | Posterior | 500                 | 5.508                 | 2.464                   | 0.506    |
|                       |           | 1000                | 10.992                | 3.782                   | 0.854    |
|                       |           | 3000                | 29.165                | 10.456                  | 5.294    |
|                       |           | 5000                | 47.550                | 16.126                  | 8.134    |
| PREDTMBB<br>62 states | Viterbi   | 500                 | 10.675                | 2.990                   | 30.236   |
|                       |           | 1000                | 20.171                | 5.256                   | 61.383   |
|                       |           | 3000                | 61.666                | 14.155                  | 174.204  |
|                       |           | 5000                | 95.548                | 21.080                  | 295.080  |
|                       | Posterior | 500                 | 13.254                | 3.238                   | 50.437   |
|                       |           | 1000                | 25.920                | 5.900                   | 100.950  |
|                       |           | 3000                | 75.943                | 17.261                  | 299.394  |
|                       |           | 5000                | 120.879               | 29.387                  | 511.065  |
| PREDTAT<br>142 states | Viterbi   | 500                 | 50.197                | 7.695                   | 121.757  |
|                       |           | 1000                | 96.830                | 13.343                  | 243.175  |



|  |           |      |         |        |          |
|--|-----------|------|---------|--------|----------|
|  |           | 3000 | 285.813 | 37.386 | 723.434  |
|  |           | 5000 | 463.032 | 60.217 | 1198.107 |
|  | Posterior | 500  | 67.891  | 8.838  | 214.173  |
|  |           | 1000 | 131.387 | 16.439 | 427.095  |
|  |           | 3000 | 370.474 | 45.670 | 1293.602 |
|  |           | 5000 | 643.665 | 79.328 | 2199.807 |

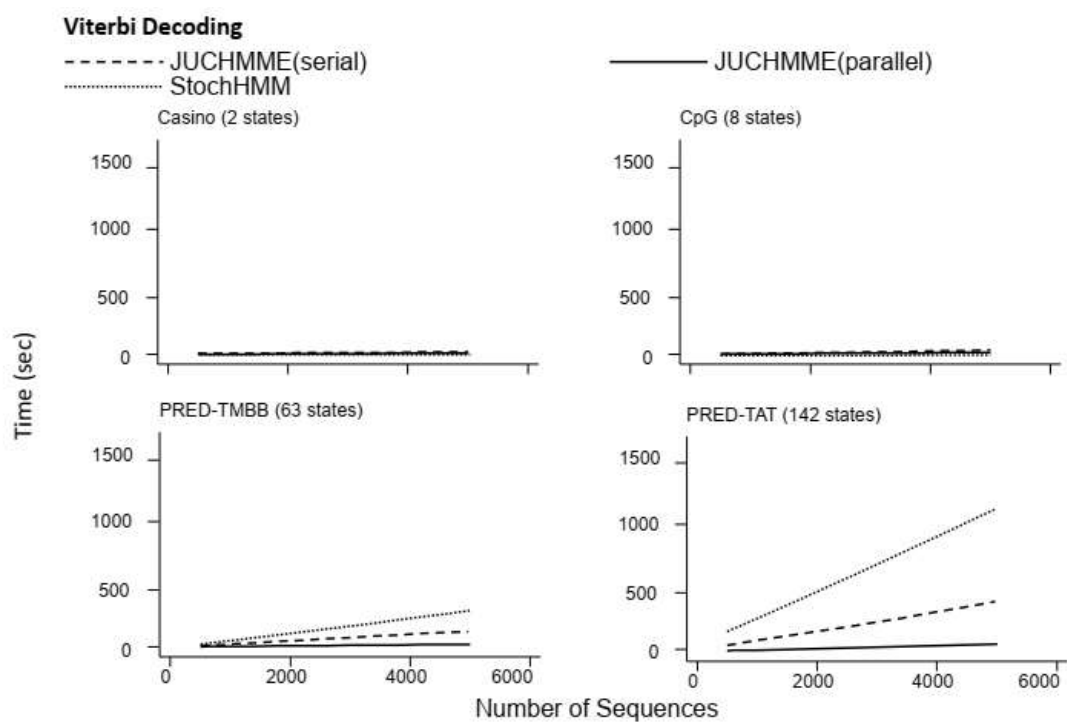

**Figure S7.** Run time comparison of JUCHMME and StochHMM using Viterbi Decoding

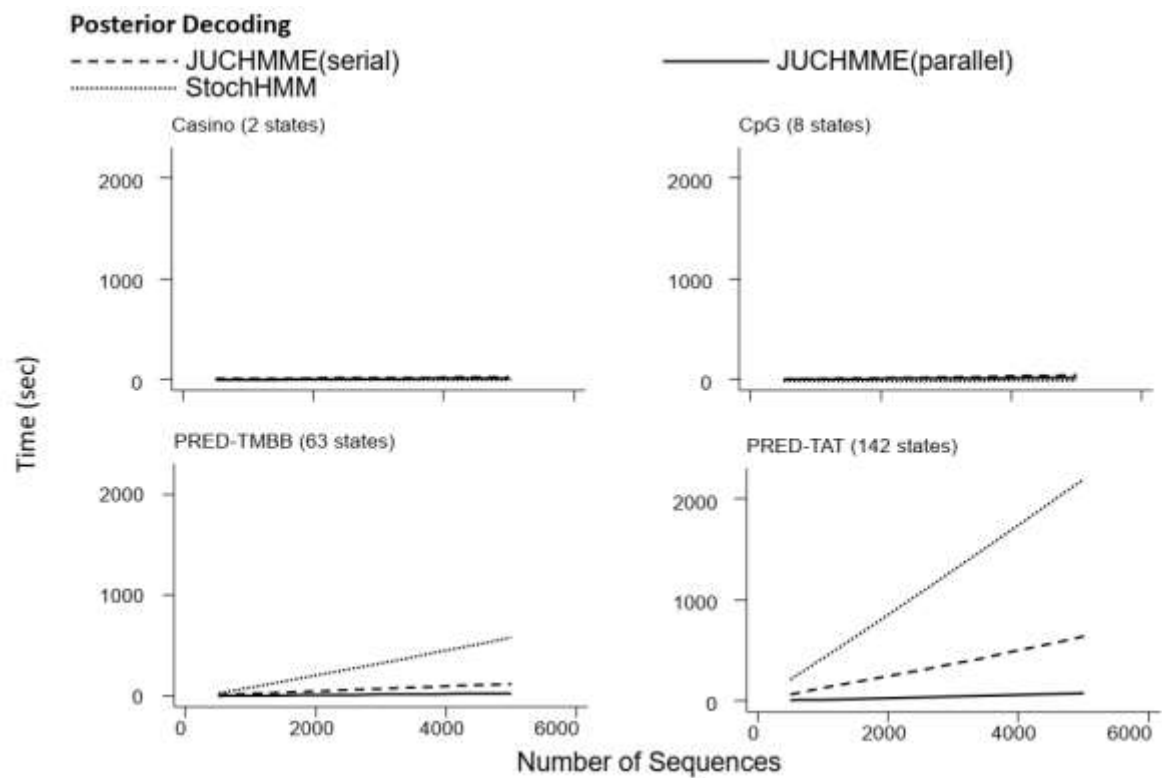

**Figure S8.** Run time comparison of JUCHMME and StochHMM using Posterior Decoding

## PART C – Comparison of Features

**Table S2.** Comparison of features available in different HMM packages. All packages provide functionalities for standard HMMs trained with Baum-Welch algorithm and decoded with Posterior/Viterbi algorithms, so these are not listed.

| Features                                                                  | JUCHMME | PHMM [4] | MAMOT [5] | StochHMM [6] | HMMoC [7] | HMMConverter [8] | Modhmm [9] | Jahmm [10] | JaCHMM [11] | UMDHMM [12] |
|---------------------------------------------------------------------------|---------|----------|-----------|--------------|-----------|------------------|------------|------------|-------------|-------------|
| <b>Types of models</b>                                                    |         |          |           |              |           |                  |            |            |             |             |
| Class HMM for Labeled Sequences (CHMM) [13]                               | ✓       | ✓        |           |              |           |                  | ✓          |            | ✓           |             |
| Hidden Neural Networks (HNN) [14]                                         | ✓       |          |           |              |           |                  |            |            |             |             |
| Higher order emissions or transitions (HOHMM, PHMM, HMMSDO) [15, 16] [17] | ✓       |          |           | ✓            | ✓         |                  |            |            |             |             |
| pair-HMMs [18]                                                            |         |          |           |              | ✓         | ✓                |            |            |             |             |
| Generalized HMMs (GHMM) [19]                                              |         |          |           |              | ✓         | ✓                |            |            |             |             |
| Inhomogeneous chains                                                      |         |          |           |              | ✓         |                  |            |            |             |             |
| Continuous emissions                                                      |         |          |           | ✓            |           |                  | ✓          |            |             |             |
| Silent states                                                             |         |          |           | ✓            |           |                  |            |            |             |             |
| Multiple emissions, Joint emissions, Lexical transitions                  |         |          |           | ✓            |           |                  |            |            |             |             |
| <b>Training Algorithms</b>                                                |         |          |           |              |           |                  |            |            |             |             |
| Conditional Maximum Likelihood (CML) training [20]                        | ✓       |          |           |              |           |                  | ✓          |            |             |             |
| Gradient-descent training (including RPROP) [21]                          | ✓       |          |           |              |           |                  |            |            |             |             |
| Viterbi Training [22]                                                     | ✓       | ✓        |           |              |           |                  |            |            |             |             |
| Semi-supervised learning (SSL) [23]                                       | ✓       |          |           |              |           |                  |            |            |             |             |
| Linear-memory Baum-Welch training [24]                                    |         |          |           |              |           | ✓                |            |            |             |             |
| Linear-memory Viterbi training [25]                                       |         |          |           |              |           | ✓                |            |            |             |             |
| <b>Decoding Algorithms</b>                                                |         |          |           |              |           |                  |            |            |             |             |
| Optimal Accuracy Posterior Decoding [26]                                  | ✓       |          |           |              |           |                  |            |            |             |             |
| N-best decoding [27]                                                      | ✓       | ✓        |           | ✓            |           |                  |            |            |             |             |
| Posterior-Viterbi decoding [28]                                           | ✓       | ✓        | ✓         |              |           |                  |            |            |             |             |
| Constrained decoding [29]                                                 | ✓       |          |           |              |           |                  |            |            |             |             |
| Stochastic decoding                                                       |         |          |           | ✓            |           |                  |            |            |             |             |
| Linear-memory posterior sampling                                          |         |          |           |              |           | ✓                |            |            |             |             |
| Hirschberg decoding algorithm [30]                                        |         |          |           |              |           | ✓                |            |            |             |             |
| <b>Utilities</b>                                                          |         |          |           |              |           |                  |            |            |             |             |
| Parameter tying (emission sharing)                                        | ✓       |          | ✓         |              |           |                  |            |            |             |             |
| Random Sequences Generator                                                | ✓       |          | ✓         |              |           |                  |            | ✓          | ✓           | ✓           |
| Multithreaded parallelization                                             | ✓       |          |           |              |           |                  |            |            |             |             |
| Can handle MSAs or profiles                                               |         |          |           |              |           |                  | ✓          |            |             |             |
| Modular architecture for model design                                     |         |          |           |              |           |                  | ✓          |            |             |             |
| Other Utilities (jackknife test, k-fold cross-validation, early stopping) | ✓       |          |           |              |           |                  |            |            |             |             |
| Documentation                                                             | ✓       |          |           | ✓            | ✓         | ✓                | ✓          |            |             |             |

"✓" indicates support for the particular feature within the application.

## References

1. Durbin, R., *Biological Sequence Analysis: Probabilistic Models of Proteins and Nucleic Acids*. 1998: Cambridge University Press.
2. Bagos, P.G., et al., *A Hidden Markov Model method, capable of predicting and discriminating beta-barrel outer membrane proteins*. BMC Bioinformatics, 2004. **5**: p. 29.
3. Bagos, P.G., et al., *Combined prediction of Tat and Sec signal peptides with hidden Markov models*. Bioinformatics, 2010. **26**(22): p. 2811-7.
4. Fariselli, P. *PHMM*. 2007; Available from: <http://www.biocomp.unibo.it/piero/PHMM/>.
5. Schütz, F. and M. Delorenzi, *MAMOT: hidden Markov modeling tool*. Bioinformatics, 2008. **24**(11): p. 1399-1400.
6. Lott, P.C. and I. Korf, *StochHMM: a flexible hidden Markov model tool and C++ library*. Bioinformatics, 2014. **30**(11): p. 1625-1626.
7. Lunter, G., *HMMoC—a compiler for hidden Markov models*. Bioinformatics, 2007. **23**(18): p. 2485-2487.
8. Lam, T.Y. and I.M. Meyer, *HMMCONVERTER 1.0: a toolbox for hidden Markov models*. Nucleic acids research, 2009. **37**(21): p. e139-e139.
9. Viklund, H. and A. Elofsson. *modhmm: Development of a modular HMM package for biological sequence analysis*. 2003 [cited 2019 4 Feb]; Available from: <http://modhmm.sourceforge.net/>.
10. Francois, J.-M., *Jahmm-An implementation of HMM in Java*. URL <http://code.google.com/p/jahmm>, 2006.
11. Ultes, S., et al. *Jachmm: a java-based conditioned hidden markov model library*. in *Acoustics, Speech and Signal Processing (ICASSP), 2013 IEEE International Conference on*. 2013. IEEE.
12. Kanungo, T., *UMDHMMQ Hidden Markov Model Toolkit.*, in *Extended Finite State Models of Language*, K. A., Editor. 1999, Cambridge University Press.
13. Krogh, A. *Hidden Markov models for labeled sequences*. in *Pattern Recognition, 1994. Vol. 2-Conference B: Computer Vision & Image Processing., Proceedings of the 12th IAPR International. Conference on*. 1994. IEEE.
14. Krogh, A. and S.K. Riis, *Hidden neural networks*. Neural Computation, 1999. **11**(2): p. 541-563.
15. Tamposis, I.A., et al., *Extending Hidden Markov Models to Allow Conditioning on Previous Observations*. Journal of Bioinformatics and Computational Biology, 2018.
16. Li, Y., *Hidden Markov models with states depending on observations*. Pattern Recogn. Lett., 2005. **26**(7): p. 977-984.
17. Forchhammer, S. and J. Rissanen, *Partially hidden Markov models*. IEEE Transactions on Information Theory, 1996. **42**(4): p. 1253-1256.
18. Arribas-Gil, A., G. Elisabeth, and M. Catherine, *Parameter Estimation in Pair-Hidden Markov Models*. Scandinavian Journal of Statistics, 2006. **33**(4): p. 651-671.
19. Majoros, W.H., et al., *Efficient decoding algorithms for generalized hidden Markov model gene finders*. BMC Bioinformatics, 2005. **6**: p. 16.
20. Krogh, A., *Two methods for improving performance of an HMM and their application for gene finding*. Proc Int Conf Intell Syst Mol Biol, 1997. **5**: p. 179-86.
21. Baldi, P. and Y. Chauvin, *Smooth on-line learning algorithms for hidden Markov models*. Neural Computation, 1994. **6**(2): p. 307-318.
22. Juang, B.-H. and L.R. Rabiner, *The segmental K-means algorithm for estimating parameters of hidden Markov models*. IEEE Transactions on acoustics, speech, and signal Processing, 1990. **38**(9): p. 1639-1641.
23. Tamposis, I.A., et al., *Semi-supervised learning of Hidden Markov Models for biological sequence analysis*. Bioinformatics, 2018: p. bty910-bty910.
24. Miklós, I. and I.M. Meyer, *A linear memory algorithm for Baum-Welch training*. BMC bioinformatics, 2005. **6**(1): p. 231.

25. Lam, T.Y. and I.M. Meyer, *Efficient parameter training for hidden Markov models using posterior sampling training and Viterbi training*. arXiv preprint arXiv:0909.0737, 2009.
26. Käll, L., A. Krogh, and E.L. Sonnhammer, *An HMM posterior decoder for sequence feature prediction that includes homology information*. Bioinformatics, 2005. **21**(suppl\_1): p. i251-i257.
27. Krogh, A., *Two methods for improving performance of an HMM and their application for gene finding*. Center for Biological Sequence Analysis. Phone, 1997. **45**: p. 4525.
28. Fariselli, P., P.L. Martelli, and R. Casadio, *A new decoding algorithm for hidden Markov models improves the prediction of the topology of all-beta membrane proteins*. BMC bioinformatics, 2005. **6**(4): p. S12.
29. Bagos, P.G., T.D. Liakopoulos, and S.J. Hamodrakas, *Algorithms for incorporating prior topological information in HMMs: application to transmembrane proteins*. BMC bioinformatics, 2006. **7**(1): p. 189.
30. Hirschberg, D.S., *A linear space algorithm for computing maximal common subsequences*. Communications of the ACM, 1975. **18**(6): p. 341-343.
